# Supplementary material
Source: publisher figshare collection journal article supplement (https://acs.figshare.com/ndownloader/files/4743847)
Supplement: Supplementary file 1 [file 4743847]

# A helical, aromatic, peptide nanotube

Marco Crisma,<sup>\*,†</sup> Claudio Toniolo,<sup>†</sup> Soledad Royo,<sup>‡</sup> Ana I. Jiménez,<sup>‡</sup> and Carlos Cativiela<sup>\*,‡</sup>

<sup>‡</sup>Department of Organic Chemistry, ICMA, University of Zaragoza – CSIC, 50009 Zaragoza (Spain)

<sup>†</sup>Institute of Biomolecular Chemistry, CNR, Department of Chemistry, University of Padova, 35131 Padova (Italy)

## Supporting Information

### General remarks:

NMR spectra of peptide **1** were recorded on a Bruker Avance DRX 400 spectrometer at room temperature, using the residual non-deuterated solvent signal as the internal standard; chemical shifts ( $\delta$ ) are expressed in ppm and coupling constants ( $J$ ) in Hertz. Peak assignment was made according to the information provided by COSY, HSQC and HMBC experiments. The IR spectrum was registered on a Mattson Genesis FTIR spectrophotometer;  $\nu_{\max}$  is given for the main absorption bands. The optical rotation was measured at room temperature using a JASCO P-1020 polarimeter. The high-resolution mass spectrum was obtained on a Bruker Microtof-Q spectrometer. The melting point was determined on a Gallenkamp apparatus. The preparation and characterization of compounds Boc-(*S,S*)c<sub>3</sub>diPhe-OH<sup>S1</sup> and Boc-(*R,R*)c<sub>3</sub>diPhe-NH<sup>i</sup>Pr<sup>S2</sup> were already reported.

**Synthesis of Boc-(*S,S*)c<sub>3</sub>diPhe-(*R,R*)c<sub>3</sub>diPhe-NH<sup>i</sup>Pr (1).** To a solution of Boc-(*S,S*)c<sub>3</sub>diPhe-OH (304 mg, 0.86 mmol) in dry CH<sub>2</sub>Cl<sub>2</sub> (4 mL) at 0°C, HOAt (59 mg, 0.43 mmol), HATU<sup>S3</sup> (327 mg, 0.86 mmol) and DIEA (0.57 mL, 3.44 mmol) were added. After 10 min, HCl·H-(*R,R*)c<sub>3</sub>diPhe-NH<sup>i</sup>Pr [obtained by treatment of the corresponding Boc-protected amino acyl isopropylamide (355 mg, 0.90 mmol) with a 3N solution of HCl in dry EtOAc] was added. The reaction mixture was stirred at room temperature for 4 days and then evaporated *in vacuo*. The residue was dissolved in EtOAc (300 mL) and the solution was washed with 10% KHSO<sub>4</sub> (3×100 mL), water (2×100 mL), 5% NaHCO<sub>3</sub> (2×100 mL), water (2×100 mL), dried over anhydrous Na<sub>2</sub>SO<sub>4</sub>, filtered and evaporated to dryness. Recrystallization of the crude product from Et<sub>2</sub>O/PE afforded the title compound (489 mg, 0.78 mmol, 90% yield) as a white solid.

mp: 122–123°C (Et<sub>2</sub>O/PE)

$[\alpha]_D^{26}$ : –65.6 (*c* 0.50, MeOH)

*R*<sub>f</sub>: 0.69 (CH<sub>2</sub>Cl<sub>2</sub>/EtOAc 8/2)

IR (nujol):  $\nu$  3420, 3368, 1700, 1643 cm<sup>–1</sup>

<sup>1</sup>H NMR (400 MHz, CDCl<sub>3</sub>):  $\delta$  0.87 (d,  $J$  = 6.4 Hz, 3H, <sup>i</sup>Pr CH<sub>3</sub>), 1.02 (d,  $J$  = 6.4 Hz, 3H, <sup>i</sup>Pr CH<sub>3</sub>), 1.26 (s, 9H, Boc CH<sub>3</sub>), 2.44 (d,  $J$  = 8.6 Hz, 1H, c<sub>3</sub>diPhe H<sup>β</sup>), 3.03 (d,  $J$  = 8.4 Hz, 1H, c<sub>3</sub>diPhe H<sup>β</sup>), 3.72 (d,  $J$  = 8.6 Hz, 1H, c<sub>3</sub>diPhe H<sup>β</sup>), 3.79 (m, 1H, <sup>i</sup>Pr CH), 3.99 (br d,  $J$  = 8.4 Hz, 1H, c<sub>3</sub>diPhe H<sup>β</sup>), 4.64 (br s, 1H, c<sub>3</sub>diPhe NH), 6.49 (br s, 1H, c<sub>3</sub>diPhe NH), 6.85 (m, 1H, NH<sup>i</sup>Pr), 7.10–7.50 (m, 20H, Ar).

<sup>13</sup>C NMR (100 MHz, CDCl<sub>3</sub>):  $\delta$  22.29 (<sup>i</sup>Pr CH<sub>3</sub>), 22.37 (<sup>i</sup>Pr CH<sub>3</sub>), 28.07 (Boc CH<sub>3</sub>), 32.70 (c<sub>3</sub>diPhe C<sup>β</sup>), 33.34 (c<sub>3</sub>diPhe C<sup>β</sup>), 37.35 (c<sub>3</sub>diPhe C<sup>β</sup>), 38.53 (c<sub>3</sub>diPhe C<sup>β</sup>), 41.65 (<sup>i</sup>Pr CH), 46.63 (c<sub>3</sub>diPhe C<sup>α</sup>), 48.54 (c<sub>3</sub>diPhe C<sup>α</sup>), 80.91 (Boc C), 126.70, 127.23, 127.27, 127.64, 127.86, 128.23, 128.48, 128.57, 128.98, 129.00, 129.09, 129.15, 134.11, 134.35, 134.88, 135.60 (Ar), 156.07 (Boc CO), 166.46 (c<sub>3</sub>diPhe CO), 169.65 (c<sub>3</sub>diPhe CO).

HRMS (ESI) C<sub>40</sub>H<sub>44</sub>N<sub>3</sub>O<sub>4</sub> [M+H]<sup>+</sup>: calcd 630.332633, found 630.333899.

### Abbreviations

Boc, *tert*-butoxycarbonyl; DIEA, *N,N*-diisopropylethylamine; HATU, {*N*–[(dimethylamino)–1*H*–1,2,3-triazolo[4,5-*b*]pyridin-1-yl-methylene]–*N*-methylmethanaminium hexafluorophosphate *N*-oxide}; HOAt, 1-hydroxy-7-azabenzotriazole; PE, petroleum ether; <sup>i</sup>Pr, isopropyl.

### References

- (S1) Jiménez, A. I.; López, P.; Oliveros, L.; Cativiela, C. *Tetrahedron* **2001**, *57*, 6019–6026.
- (S2) Royo, S.; De Borggraeve, W. M.; Peggion, C.; Formaggio, F.; Crisma, M.; Jiménez, A. I.; Cativiela, C.; Toniolo, C. *J. Am. Chem. Soc.* **2005**, *127*, 2036–2037.
- (S3) Carpino, L. A. *J. Am. Chem. Soc.* **1993**, *115*, 4397–4398.

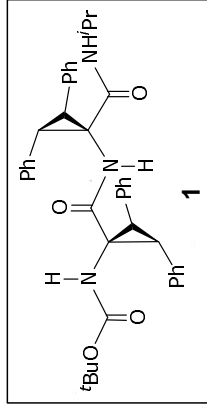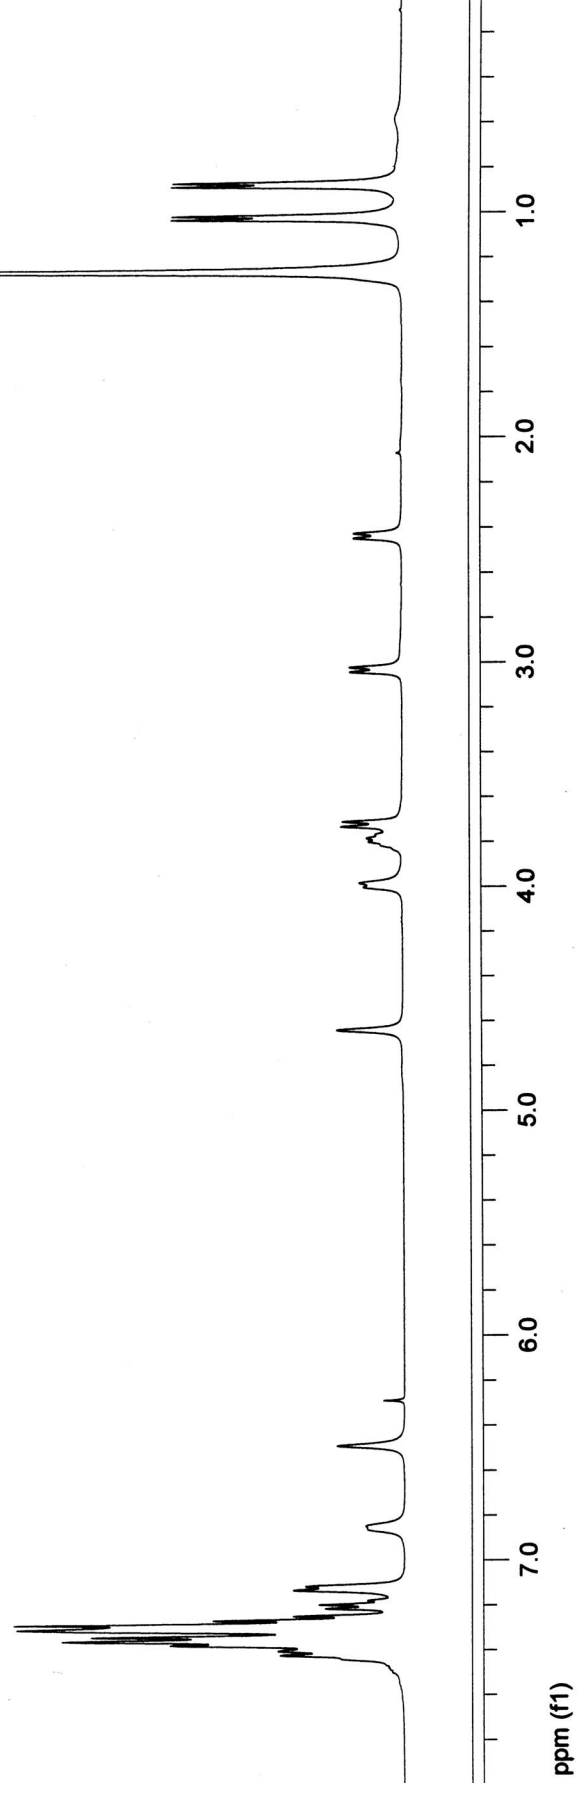

Figure S1. <sup>1</sup>H NMR (400 MHz) spectrum of peptide **1** in CDCl<sub>3</sub>.

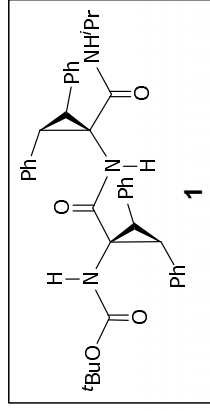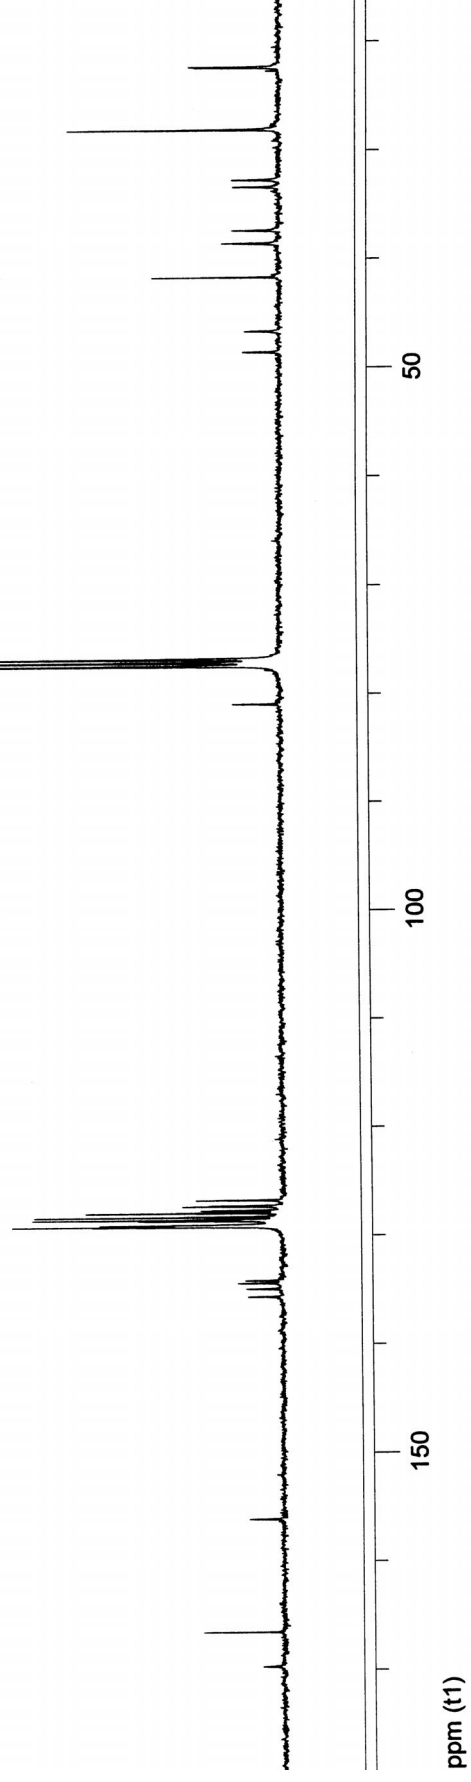

Figure S2. <sup>13</sup>C NMR (100 MHz) spectrum of peptide **1** in CDCl<sub>3</sub>.
